# Supplementary material for: An autoregulatory switch in sex-specific phf7 transcription causes loss of sexual identity and tumors in the Drosophila female germline
Source: Oxford University Press journal article supplement (doi:10.1242/dev.192856), 2020-01-01
Supplement: dev192856supp.pdf [file dev192856supp.pdf]

**Fig. S1 The *phf7*<sup>ΔORF</sup>::GFP allele is sex-specifically regulated.** (A) Schematic of the *phf7*<sup>ΔORF</sup>::GFP allele in which the open reading frame was replaced by GFP (green box). Primers for RT-qPCR are indicated by arrowheads: Gray for *phf7*-RC, and Green for GFP. (B) RT-qPCR measurements of *phf7*-RC transcript in *phf7*<sup>ΔORF</sup>::GFP ovaries and testis. Error Bars indicate standard deviation of three biological replicates. (C) Confocal images of testis from hemizygous *phf7*<sup>ΔORF</sup>::GFP males and ovaries from homozygous *phf7*<sup>ΔORF</sup>::GFP females stained for GFP protein (green) and DNA (red). Scale bar, 50 μm.

**A** *phf7*<sup>ΔORF</sup>::GFP

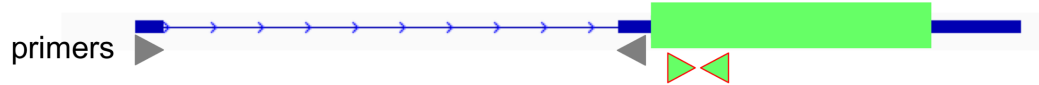

**B**

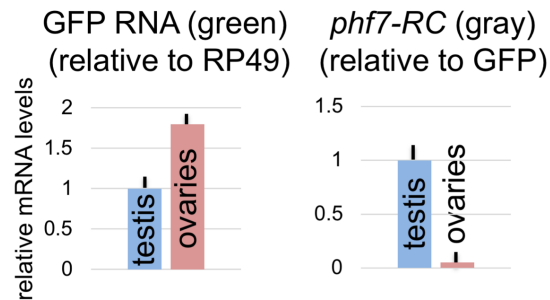

**C**

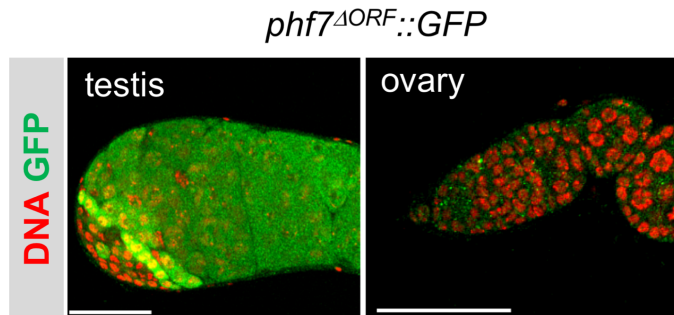

**Fig. S2. Ectopic PHF7 stimulates testis-like expression from the knock-in  $phf7^{\Delta ORF}::GFP$  allele** Ectopic PHF7 can induce testis-like expression from the knock-in  $phf7^{\Delta ORF}::GFP$  allele. Confocal images of ovarioles from  $phf7^{\Delta ORF}::GFP; nos>phf7$  and control  $phf7^{\Delta ORF}::GFP; nos>phf7^{\Delta PHD}$  females stained for GFP protein (green) and DNA (red). Scale bar, 50  $\mu m$ .

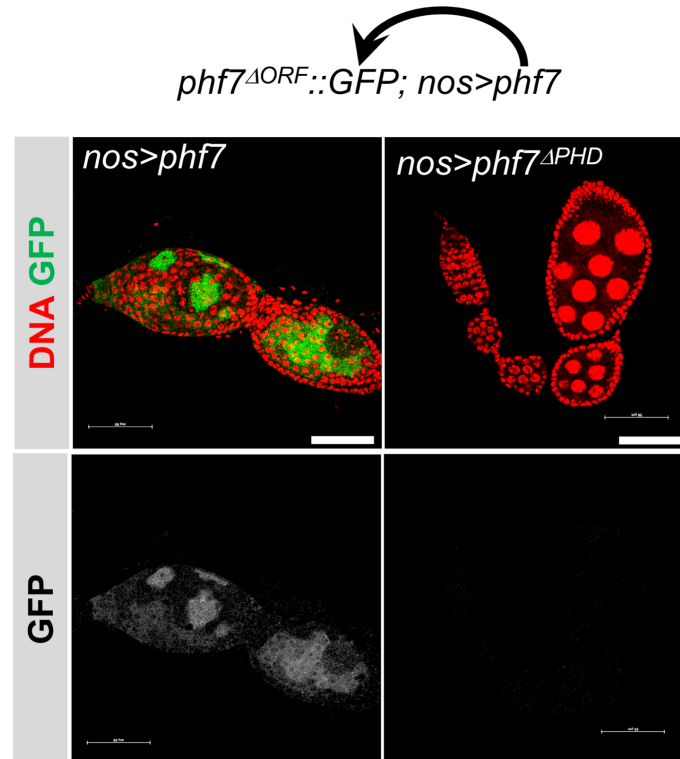

## Table S1

[Click here to Download Table S1](#)

## Table S2

[Click here to Download Table S2](#)

## Table S3

[Click here to Download Table S3](#)

## Table S4

[Click here to Download Table S4](#)
